# Supplementary material for: Altered Gene Regulatory Networks Are Associated With the Transition From C3 to Crassulacean Acid Metabolism in Erycina (Oncidiinae: Orchidaceae)
Source: Front Plant Sci. 2019 Jan 28;9:2000. doi: 10.3389/fpls.2018.02000 (PMC6360190; doi:10.3389/fpls.2018.02000)
Supplement: Supplementary file 5 [file Table_2.xlsx]

## Sheet: Data
Species	Sample	simple	H+	size
ecg	6AM	6AM	94.5946
ecg	6AM	6AM	90.4523
ecg	6AM	6AM	141.414
ecg	6PM	6PM	100
ecg	6PM	6PM	98.5915
ecg	6PM	6PM	128.378
ep	10AM	10AM	27.68	large
ep	10PM	10PM	10.31	large
ep	12AM	12AM	16.13	large
ep	12PM	12PM	19.69	large
ep	2AM	2AM	10.85	large
ep	2PM	2PM	17.54	large
ep	4AM	4AM	12.6	large
ep	4PM	4PM	16.33	large
ep	6AM	6AM	10.71	large
ep	6PM	6PM	18.54	large
ep	8AM	8AM	14.15	large
ep	8PM	8PM	9.88	large
ep	10AM	10AM	29.27	med
ep	10AM	10AM	42.86	med
ep	10PM	10PM	24.15	med
ep	12AM	12AM	19.39	med
ep	12AM	12AM	22.77	med
ep	12PM	12PM	57.14	med
ep	12PM	12PM	50	med
ep	2AM	2AM	19.91	med
ep	2AM	2AM	26.36	med
ep	2PM	2PM	37.41	med
ep	2PM	2PM	29.78	med
ep	4AM	4AM	19.9	med
ep	4AM	4AM	21.47	med
ep	4PM	4PM	20.47	med
ep	4PM	4PM	41.88	med
ep	6AM	6AM	38.46	med
ep	6AM	6AM	16.28	med
ep	6PM	6PM	31.13	med
ep	6PM	6PM	16.13	med
ep	8AM	8AM	2.81	med
ep	8AM	8AM	30.27	med
ep	8PM	8PM	25.47	med
ep	8PM	8PM	23.42	med
ep	10AM-R1	10AM	13.4328
ep	10AM-R2	10AM	10.1614
ep	10AM-R3	10AM	11.9641
ep	10AM-R4	10AM	9.26661
ep	10AM-R5	10AM	9.58379
ep	10PM-R1	10PM	3.21543
ep	10PM-R2	10PM	10.2861
ep	10PM-R3	10PM	2.50627
ep	10PM-R4	10PM	16.4136
ep	10PM-R5	10PM	13.4921
ep	10PM	10PM	38.46
ep	2AM-R1	2AM	19.2077
ep	2AM-R2	2AM	16.9794
ep	2AM-R3	2AM	9.1104
ep	2AM-R4	2AM	18.9873
ep	2AM-R5	2AM	17.9641
ep	2PM-R1	2PM	8.21918
ep	2PM-R2	2PM	9.86105
ep	2PM-R4	2PM	9.40734
ep	2PM-R5	2PM	9.38708
ep	6AM-R1	6AM	29.1751
ep	6AM-R2	6AM	3.7679
ep	6AM-R3	6AM	29.1262
ep	6AM-R4	6AM	24.7012
ep	6AM-R5	6AM	22.6214
ep	6PM-R1	6PM	3.91213
ep	6PM-R2	6PM	10.3528
ep	6PM-R3	6PM	12.8617
ep	6PM-R4	6PM	12.8327
ep	6PM-R5	6PM	11.7302
