# Supplementary material for: Altered Gene Regulatory Networks Are Associated With the Transition From C3 to Crassulacean Acid Metabolism in Erycina (Oncidiinae: Orchidaceae)
Source: Front Plant Sci. 2019 Jan 28;9:2000. doi: 10.3389/fpls.2018.02000 (PMC6360190; doi:10.3389/fpls.2018.02000)
Supplement: Supplementary file 7 [file Table_4.xlsx]

## Sheet: Data
GO ID	P-value	FDR p-value	Annotation
GO:0070696	3.99e-15	2.24e-12	transmembrane receptor protein serine/threonine kinase binding
GO:0004497	3.12e-14	8.69e-12	monooxygenase activity
GO:0080103	6.18e-14	8.69e-12	4-methylthiopropyl glucosinolate S-oxygenase activity
GO:0080107	6.18e-14	8.69e-12	8-methylthiopropyl glucosinolate S-oxygenase activity
GO:0007010	1.02e-13	1.15e-11	cytoskeleton organization
GO:0033169	2.37e-13	2.22e-11	histone H3-K9 demethylation
GO:0005200	1.14e-12	8.03e-11	structural constituent of cytoskeleton
GO:0005777	1.03e-12	8.03e-11	peroxisome
GO:0010452	1.82e-12	1.13e-10	histone H3-K36 methylation
GO:0010498	3.32e-11	1.86e-09	proteasomal protein catabolic process
GO:0004021	5.34e-11	2.73e-09	L-alanine:2-oxoglutarate aminotransferase activity
GO:0009306	1.19e-10	5.13e-09	protein secretion
GO:0045727	1.19e-10	5.13e-09	positive regulation of translation
GO:0032776	1.57e-09	6.29e-08	DNA methylation on cytosine
GO:0005525	4.5e-09	1.69e-07	GTP binding
GO:0031897	4.6e-08	1.62e-06	Tic complex
GO:0015031	2.68e-07	8.87e-06	protein transport
GO:0005681	2.92e-07	9.13e-06	spliceosomal complex
GO:0000902	5.04e-07	1.49e-05	cell morphogenesis
GO:0005856	9.12e-07	2.56e-05	cytoskeleton
GO:0000266	1.35e-06	3.04e-05	mitochondrial fission
GO:0004499	1.35e-06	3.04e-05	N,N-dimethylaniline monooxygenase activity
GO:0009095	1.35e-06	3.04e-05	aromatic amino acid family biosynthetic process, prephenate pathway
GO:0031062	1.35e-06	3.04e-05	positive regulation of histone methylation
GO:0047958	1.35e-06	3.04e-05	glycine:2-oxoglutarate aminotransferase activity
GO:0005484	2.8e-06	6.04e-05	SNAP receptor activity
GO:0004029	5.17e-06	0.000103916	aldehyde dehydrogenase (NAD) activity
GO:0048768	5.18e-06	0.000103916	root hair cell tip growth
GO:0000062	1e-05	0.000194678	fatty-acyl-CoA binding
GO:0016567	1.55e-05	0.000289998	protein ubiquitination
GO:0004028	1.79e-05	0.000324447	3-chloroallyl aldehyde dehydrogenase activity
GO:0009705	2.09e-05	0.000366247	plant-type vacuole membrane
GO:0009524	2.34e-05	0.000386336	phragmoplast
GO:0016559	2.34e-05	0.000386336	peroxisome fission
GO:0005797	3.96e-05	0.000551087	Golgi medial cisterna
GO:0009294	4.02e-05	0.000551087	DNA mediated transformation
GO:0031201	3.96e-05	0.000551087	SNARE complex
GO:0032585	3.96e-05	0.000551087	multivesicular body membrane
GO:0080102	3.96e-05	0.000551087	3-methylthiopropyl glucosinolate S-oxygenase activity
GO:0080104	3.96e-05	0.000551087	5-methylthiopropyl glucosinolate S-oxygenase activity
GO:0080106	3.96e-05	0.000551087	7-methylthiopropyl glucosinolate S-oxygenase activity
GO:0000956	4.37e-05	0.000584121	nuclear-transcribed mRNA catabolic process
GO:0005634	6.2e-05	0.000809791	nucleus
GO:0016021	6.78e-05	0.000866205	integral component of membrane
GO:0009941	7.14e-05	0.000892	chloroplast envelope
GO:0008380	7.6e-05	0.000928515	RNA splicing
GO:0004033	8.47e-05	0.000951899	aldo-keto reductase (NADP) activity
GO:0004709	8.47e-05	0.000951899	MAP kinase kinase kinase activity
GO:0015271	8.47e-05	0.000951899	outward rectifier potassium channel activity
GO:0042644	8.47e-05	0.000951899	chloroplast nucleoid
GO:0004872	0.000103749	0.00114328	receptor activity
GO:0004674	0.000157835	0.00165864	protein serine/threonine kinase activity
GO:0030968	0.000159371	0.00165864	endoplasmic reticulum unfolded protein response
GO:0035064	0.00015452	0.00165864	methylated histone binding
GO:0009853	0.000257577	0.00263197	photorespiration
GO:0040029	0.000536591	0.00538507	regulation of gene expression, epigenetic
GO:0016887	0.000676658	0.00667161	ATPase activity
GO:0007062	0.000734886	0.0070001	sister chromatid cohesion
GO:0070919	0.000733715	0.0070001	production of siRNA involved in chromatin silencing by small RNA
GO:0000979	0.00116298	0.00816992	RNA polymerase II core promoter sequence-specific DNA binding
GO:0004168	0.00116298	0.00816992	dolichol kinase activity
GO:0006094	0.000957454	0.00816992	gluconeogenesis
GO:0006723	0.00116298	0.00816992	cuticle hydrocarbon biosynthetic process
GO:0006824	0.00116298	0.00816992	cobalt ion transport
GO:0008453	0.00116298	0.00816992	alanine-glyoxylate transaminase activity
GO:0009514	0.00116298	0.00816992	glyoxysome
GO:0010059	0.00116298	0.00816992	positive regulation of atrichoblast fate specification
GO:0010063	0.00116298	0.00816992	positive regulation of trichoblast fate specification
GO:0016116	0.00116298	0.00816992	carotenoid metabolic process
GO:0019255	0.00116298	0.00816992	glucose 1-phosphate metabolic process
GO:0019481	0.00116298	0.00816992	L-alanine catabolic process, by transamination
GO:0030133	0.00116298	0.00816992	transport vesicle
GO:0031490	0.00116298	0.00816992	chromatin DNA binding
GO:0031520	0.00116298	0.00816992	plasma membrane of cell tip
GO:0032454	0.00116298	0.00816992	histone demethylase activity (H3-K9 specific)
GO:0033506	0.00116298	0.00816992	glucosinolate biosynthetic process from homomethionine
GO:0033853	0.00116298	0.00816992	aspartate-prephenate aminotransferase activity
GO:0033854	0.00116298	0.00816992	glutamate-prephenate aminotransferase activity
GO:0072660	0.00116298	0.00816992	maintenance of protein location in plasma membrane
GO:0080105	0.00116298	0.00816992	6-methylthiopropyl glucosinolate S-oxygenase activity
GO:0045132	0.00140453	0.00974501	meiotic chromosome segregation
GO:0000719	0.00176871	0.0121221	photoreactive repair
GO:0005524	0.00183652	0.0124352	ATP binding
GO:0006886	0.00194451	0.0126053	intracellular protein transport
GO:0007169	0.00192674	0.0126053	transmembrane receptor protein tyrosine kinase signaling pathway
GO:0031048	0.00191555	0.0126053	chromatin silencing by small RNA
GO:0043130	0.00195136	0.0126053	ubiquitin binding
GO:0033044	0.00223892	0.0142986	regulation of chromosome organization
GO:0019761	0.00250038	0.0157889	glucosinolate biosynthetic process
GO:0015450	0.00285288	0.0174274	P-P-bond-hydrolysis-driven protein transmembrane transporter activity
GO:0016973	0.00285288	0.0174274	poly(A)+ mRNA export from nucleus
GO:0072661	0.00285288	0.0174274	protein targeting to plasma membrane
GO:0005253	0.00340965	0.0201707	anion channel activity
GO:0010288	0.00340965	0.0201707	response to lead ion
GO:0070063	0.00340965	0.0201707	RNA polymerase binding
GO:0006468	0.00357629	0.0209362	protein phosphorylation
GO:0006354	0.00408181	0.0236493	DNA-templated transcription, elongation
GO:0008284	0.00492495	0.0282431	positive regulation of cell proliferation
GO:0003725	0.00532429	0.0302248	double-stranded RNA binding
GO:0048767	0.00541314	0.0304218	root hair elongation
GO:0004712	0.00564089	0.0313879	protein serine/threonine/tyrosine kinase activity
GO:0010053	0.00604049	0.0332819	root epidermal cell differentiation
GO:0005247	0.00666477	0.0334429	voltage-gated chloride channel activity
GO:0005847	0.00666477	0.0334429	mRNA cleavage and polyadenylation specificity factor complex
GO:0006048	0.00666477	0.0334429	UDP-N-acetylglucosamine biosynthetic process
GO:0006821	0.00666477	0.0334429	chloride transport
GO:0010449	0.00666477	0.0334429	root meristem growth
GO:0016558	0.0064419	0.0334429	protein import into peroxisome matrix
GO:0035194	0.00666477	0.0334429	posttranscriptional gene silencing by RNA
GO:0035279	0.00666477	0.0334429	mRNA cleavage involved in gene silencing by miRNA
GO:0044375	0.00666477	0.0334429	regulation of peroxisome size
GO:0048188	0.00666477	0.0334429	Set1C/COMPASS complex
GO:0016926	0.00748144	0.0372086	protein desumoylation
GO:0005635	0.00834307	0.0411299	nuclear envelope
GO:0006487	0.00864818	0.0422633	protein N-linked glycosylation
GO:0000226	0.00914135	0.0442883	microtubule cytoskeleton organization
